# Supplementary material
Source: PubMed Central journal article supplement (PMC5023611)
Supplement: 11606_2016_3767_MOESM1_ESM.pdf [file 11606_2016_3767_MOESM1_ESM.pdf]

# Forgiven But Not Relieved: US Physician Workforce Consequences of Changes to Public Service Loan Forgiveness

## Supplementary Appendix

### Table of Contents

|                                                                                                                                           |         |
|-------------------------------------------------------------------------------------------------------------------------------------------|---------|
| <b>Study Methodology</b> .....                                                                                                            | page 2  |
| <b>Supplementary Figure 1:</b> Number of Medical School Graduates by Educational Debt Level, 2000-2013.....                               | page 5  |
| <b>Supplementary Figure 2:</b> US Medical School Loans by Source, 2010-2013.....                                                          | page 6  |
| <b>Supplementary Figure 3:</b> Sensitivity Analysis of Planned Public Service Loan Forgiveness Participation by Specialty, 2010-2014..... | page 7  |
| <b>Supplementary Table 1.</b> Federal Loan Repayment Programs.....                                                                        | page 8  |
| <b>Supplementary Table 2.</b> US Medical Graduates Planning to Use Public Service Loan Forgiveness by Specialty,* 2010-2014.....          | page 9  |
| <b>Supplementary References</b> .....                                                                                                     | page 10 |

## **Study Methodology:**

We sought to determine the intended participation in Public Service Loan Forgiveness by physician specialty and estimate the total cost of physician participation in the Public Service Loan Forgiveness program to the federal government.

### **Intended loan forgiveness program participation by specialty**

We estimated intended Public Service Loan Forgiveness program participation by intended specialty using data from the Association of American Medical Colleges Medical Student Graduation Questionnaire. Data on intended loan forgiveness program participation were available from 2010 to 2014. De-identified individual-level data were used for the analysis. Only data for those individuals responding to both intended loan forgiveness program participation and intended specialty were used (n = 55,905). The data used for the analysis represent approximately 80% of medical graduates in the sample. Graduates were assigned to one of three categories: primary care eligible specialties, medical specialties, or surgical specialties, based on their indication of specialty choice at the time of graduation.

Primary care eligible specialties were defined as those individuals indicating an intended career in family medicine, pediatrics, general internal medicine, medicine-pediatrics, or preventive medicine. This definition is consistent with that of the US Health Services and Resources Administration.<sup>S1</sup> Other medical specialties were defined as allergy/immunology, dermatology, emergency medicine, medical genetics, neurology, pathology, physical medicine and rehabilitation, psychiatry, radiology,

radiation oncology, or hospice and palliative medicine. Surgical specialties were defined as anesthesiology, colon and rectal surgery, neurological surgery, obstetrics and gynecology, ophthalmology, orthopedics, otolaryngology, plastic surgery, general surgery, thoracic surgery, or urology. These assignments are consistent with that used by the AAMC in recent studies.<sup>S2</sup> We additionally display the intended participation for PSLF by select specialties from 2010 to 2014 in Supplementary Table 2.

### **Sensitivity Analysis**

Given that historical match rates have found only 25% of internal medicine graduates pursue primary care,<sup>S3</sup> we have conducted a sensitivity analysis, which randomly assigns those going into internal medicine to primary care or other specialties. For those indicating general internal medicine or medicine-pediatrics, we randomly assigned to primary care or medical specialty with a 25%/75% probability, respectively, (using Bernoulli trials) to reflect the proportion of internal medicine residents who have historically pursued primary care. This stochastic assignment was then repeated 1,000 times to produce confidence intervals around the resultant estimate. The results can be seen in Supplementary Figure 3.

### **Statistical Analysis**

We used a chi-squared test to determine differences in PSLF intended use across specialties with the significance level set a priori at  $P < 0.05$ . The statistical analysis was conducted using STATA version 13.0 (StataCorp LP, College Station, TX).

### **AAMC survey question validation**

Since the survey question is largely untested, we sought to determine the validity of the survey question regarding choice of loan forgiveness program by comparing the proportion responding in the affirmative to intent to use National Health Survey Corp loan forgiveness within the Association of American Medical Colleges Medical Student Graduation Questionnaire to the proportion of medical students who actually applied to the National Health Service Corp. In 2014, 7.6% of AAMC survey respondents indicated intent to use National Health Service Corp loan forgiveness, whereas 6.5% of 2014 graduates actually applied to the program.

### **Cost estimation of Public Service Loan Forgiveness for US medical graduates**

We used the average loan forgiveness amount after 10 years of public service under PSLF assuming a Pay As You Earn income driven repayment plan (See Supplementary Table 1) for physicians as estimated by the Association of American Medical Colleges.<sup>S4</sup> Total cost estimations were generated using the average individual estimated cost of forgiveness and the number of medical graduates reporting intended Public Service Loan Forgiveness participation within the sample. The 80% sample from the Association of American Medical Colleges Medical Student Graduation Questionnaire was used to make projections in order to generate a conservative estimate on cost. Given the payout for 2014 graduates would not occur until 10 years post-graduation, cost was adjusted using a discount rate of 6%,<sup>S5</sup> and reported in net present value dollars to provide a better comparison to current loan forgiveness programs (e.g., National Health Service Corp).

**Supplementary Figure 1. Number of Medical School Graduates by Educational Debt Level, 2000-2013\***

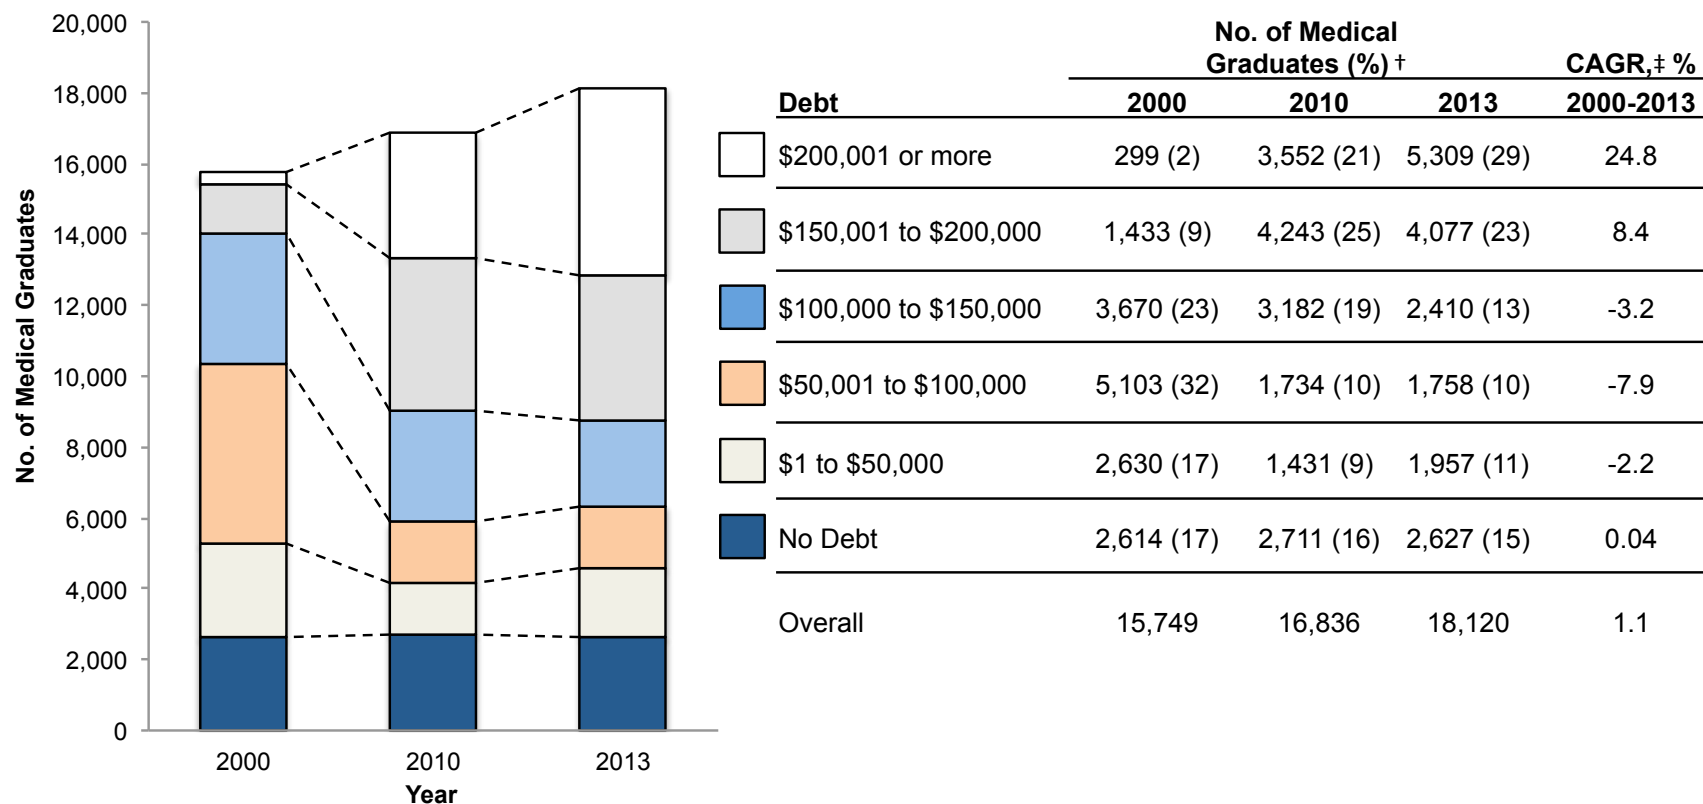

\* Total educational debt at graduation from medical school was taken from the AAMC medical school graduation questionnaire, 2000-2013. Data are displayed in number of medical graduates based on weights to approximate the population of medical graduates in the US in each year from the AAMC databook.<sup>S6</sup> Figures were not adjusted for inflation due to data reported in categories of debt by year.

† When compared to other professional training in 2011-2012, the proportion of medical graduates with educational loans was 85% (AAMC), compared to 82% for law graduates, 38% for masters in business administration graduates, and 17% for doctoral degree program graduates (from the 2011-12 National Postsecondary Student Aid Studies).<sup>S7</sup>

‡ CAGR (Compound annual growth rate) supposing that year A is X and year B is Y,  $CAGR = (Y/X)^{1/(B-A)} - 1$ .

**Supplementary Figure 2. US Medical School Loans by Source, 2010-2013\***

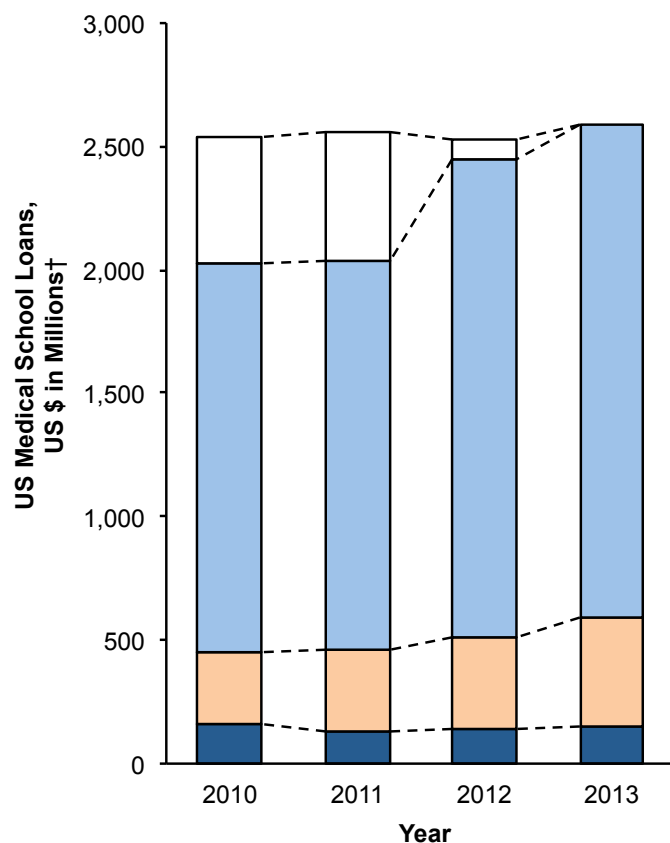

| US Medical School Loans,<br>US \$ in Millions† |                |                |                |                |
|------------------------------------------------|----------------|----------------|----------------|----------------|
| Loan Source                                    | 2010           | 2011           | 2012           | 2013           |
| Federal Direct Subsidized Loans‡               | 520.4          | 521.3          | 80.1           | 0.0            |
| Federal Direct Unsubsidized Loans‡             | 1,571.5        | 1,573.7        | 1,929.6        | 1,999.7        |
| Federal Direct Grad PLUS Loans‡                | 292.5          | 337.1          | 372.5          | 436.3          |
| All other loans                                |                |                |                |                |
| Federal Perkins Loans                          | 31.2           | 34.6           | 41.0           | 48.9           |
| Primary Care Loan                              | 9.1            | 8.3            | 7.8            | 5.9            |
| Loans for Disadvantaged Students               | 19.3           | 8.6            | 10.2           | 13.0           |
| Federal Stafford or FFELP loans                | 25.2           | 0.0            | 0.0            | 0.0            |
| State-Funded Loans                             | 5.3            | 5.5            | 5.8            | 6.3            |
| Private Loan Programs                          | 8.9            | 14.3           | 18.6           | 18.0           |
| Other loans                                    | 59.5           | 57.9           | 60.4           | 59.4           |
| <b>Total Loans</b>                             | <b>2,543.0</b> | <b>2,561.3</b> | <b>2,525.9</b> | <b>2,587.5</b> |

\* Aggregate data on loans were obtained from the AAMC Databook from 2000-2013.<sup>S6</sup>

† Dollar amounts were adjusted to 2013 dollars using the US consumer price index from the Bureau of Labor Statistics.

‡ Federal Direct Loans (including subsidized, unsubsidized, and Grad PLUS loans) are those eligible for forgiveness under the Public Service Loan Forgiveness Program. All other loans may become eligible depending on consolidation.

**Supplementary Figure 3. Sensitivity Analysis of Planned Public Service Loan Forgiveness Participation by Specialty, 2010-2014**

**Proportion Planning to Participate in Public Service Loan Forgiveness (PSLF)\***

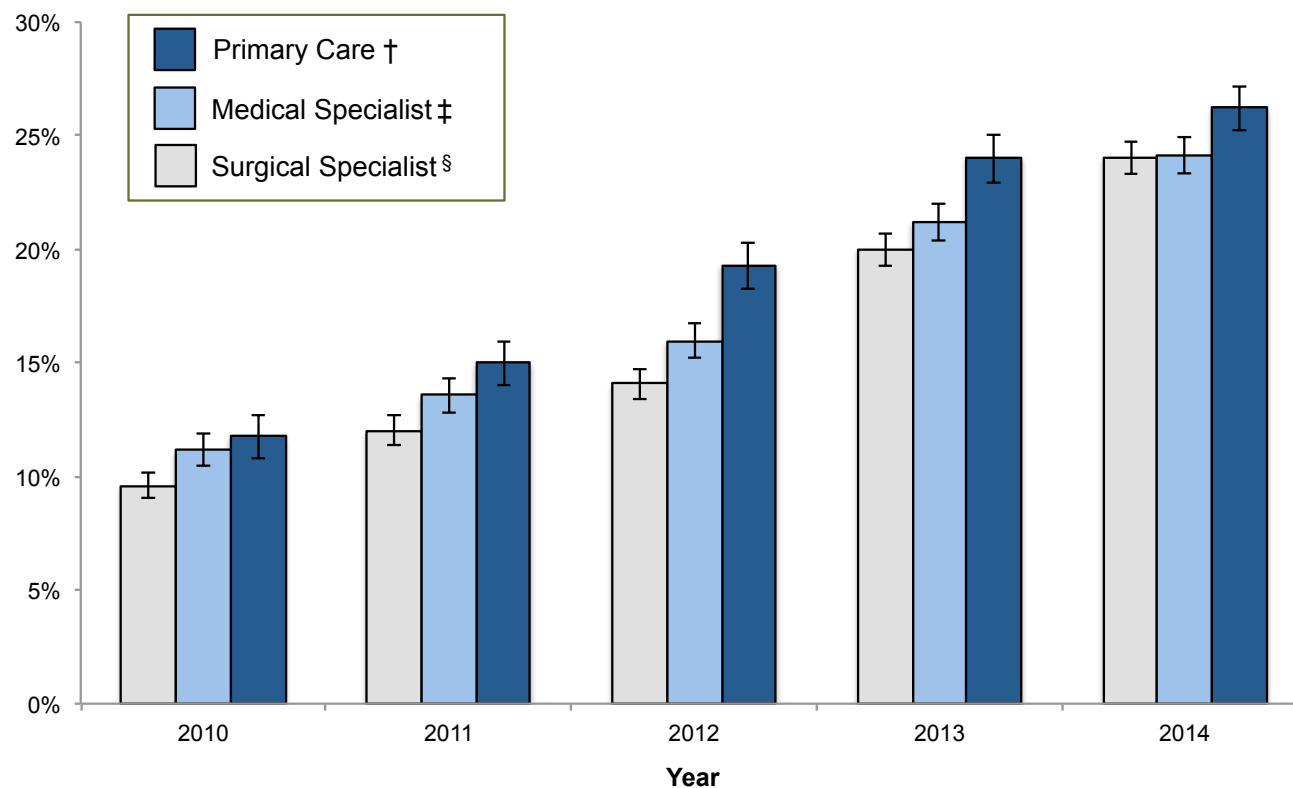

\* Data are from the AAMC Graduation Questionnaire, 2010-2014. For those indicating general internal medicine or medicine/pediatrics, we stochastically assigned 25% of observations within each year using a uniform distribution to primary care in accordance with the proportion reporting the choice of general internal medicine from match results. Error bars represent 95% confidence intervals.

† Primary care includes family medicine, pediatrics, and a 25% random sample of internal medicine and internal medicine/pediatrics.

‡ Medical specialties include allergy/immunology, dermatology, emergency medicine, medical genetics, neurology, pathology, physical medicine and rehabilitation, preventive medicine, psychiatry, radiology, radiation oncology, hospice and palliative medicine, and a 75% random sample of internal medicine and internal medicine/pediatrics.

§ Surgical specialties include anesthesiology, colon and rectal surgery, general surgery, neurological surgery, obstetrics and gynecology, ophthalmology, orthopedics, otolaryngology, plastic surgery, thoracic surgery, and urology.

**Supplementary Table 1. Federal Loan Repayment Programs<sup>S8</sup>**

| Repayment Plan                              | Eligible Loans* | Payment Term               | Payment Calculation                                                                                | Eligible for PSLF | Comments                                                                                                                                                                                   |
|---------------------------------------------|-----------------|----------------------------|----------------------------------------------------------------------------------------------------|-------------------|--------------------------------------------------------------------------------------------------------------------------------------------------------------------------------------------|
| Standard Repayment                          | Direct and FFEL | 10 years, no forgiveness   | Fixed annual payments based on repaying total amount borrowed and accumulated interest in 10 years | Yes               | Default plan in place if the borrower selects no other repayment plan                                                                                                                      |
| Extended Repayment                          | Direct and FFEL | 25 years, no forgiveness   | Fixed annual payments based on repaying total amount borrowed and accumulated interest in 25 years | No                | Must reapply for program annually                                                                                                                                                          |
| Income Contingent Repayment                 | Direct only     | 25 years, then forgiveness | Payments based on 20% of monthly discretionary income, no repayment cap                            | Yes               | Must be a new borrower on or after 7/1/2014 and have partial financial hardship§                                                                                                           |
| Income Based Repayment† (prior to 7/1/2014) | Direct and FFEL | 25 years, then forgiveness | Payments based on a cap of 15% of monthly discretionary income‡                                    | Yes               | Must have partial financial hardship; Must provide annual income verification                                                                                                              |
| Pay As You Earn†                            | Direct only     | 20 years, then forgiveness | Payments capped at 10% of monthly discretionary income and based on family size and household AGI‡ | Yes               | Must be a new borrower on or after 10/1/2007 and must have received a loan disbursement on or after 10/1/2011; Must have partial financial hardship and provide annual income verification |

Abbreviations: FFEL = Federal Family Education Loans; PSLF = Public Service Loan Forgiveness

\* Federal Family Education Loans (FFEL) include Stafford Loans, Unsubsidized Stafford Loans, Federal PLUS Loans and Federal Consolidation Loans. After the Health Care and Education reconciliation Act of 2010, no new FFEL Program Loans. The US Department of Education disperses education loans through the William D. Ford Federal Direct Loan Program.

† Monthly payments do not have to exceed the monthly payments calculated under the standard repayment plan. A recently introduced Revised Pay As You Earn (REPAYE) program was introduced which removes this clause.

‡ Discretionary income is adjusted gross income minus 150% of the household poverty line. Adjusted gross income is total income minus any deductions.

§ Partial financial hardship is when annual amount due on loans, as calculated under the standard repayment plan, exceeds 15% of borrower's discretionary income.



**Supplementary Table 2. US Medical Graduates Planning to Use Public Service Loan Forgiveness by Specialty,\* 2010-2014**

| Specialties                | Measure          | 2010 | 2011 | 2012 | 2013 | 2014 | CAGR† (%) |
|----------------------------|------------------|------|------|------|------|------|-----------|
| Internal Medicine          | No. of Graduates | 202  | 256  | 289  | 388  | 488  | 24.7      |
|                            | Percent          | 12%  | 15%  | 17%  | 24%  | 27%  |           |
| Pediatrics                 | No. of Graduates | 135  | 181  | 215  | 261  | 338  | 25.8      |
|                            | Percent          | 13%  | 17%  | 22%  | 26%  | 29%  |           |
| Emergency Medicine         | No. of Graduates | 102  | 104  | 173  | 157  | 195  | 17.6      |
|                            | Percent          | 11%  | 11%  | 19%  | 17%  | 21%  |           |
| Obstetrics & Gynecology    | No. of Graduates | 96   | 112  | 106  | 126  | 193  | 19.1      |
|                            | Percent          | 13%  | 17%  | 17%  | 20%  | 29%  |           |
| General Surgery            | No. of Graduates | 103  | 89   | 110  | 154  | 188  | 16.2      |
|                            | Percent          | 14%  | 15%  | 18%  | 25%  | 29%  |           |
| Family Medicine            | No. of Graduates | 57   | 75   | 94   | 124  | 168  | 31.0      |
|                            | Percent          | 9%   | 12%  | 16%  | 20%  | 22%  |           |
| Anesthesia                 | No. of Graduates | 73   | 84   | 91   | 140  | 143  | 18.3      |
|                            | Percent          | 8%   | 11%  | 11%  | 20%  | 21%  |           |
| Radiology                  | No. of Graduates | 61   | 75   | 81   | 91   | 112  | 16.4      |
|                            | Percent          | 8%   | 12%  | 14%  | 18%  | 24%  |           |
| Psychiatry                 | No. of Graduates | 59   | 83   | 69   | 85   | 96   | 12.9      |
|                            | Percent          | 11%  | 19%  | 17%  | 22%  | 25%  |           |
| Orthopedics                | No. of Graduates | 44   | 52   | 61   | 70   | 92   | 20.2      |
|                            | Percent          | 7%   | 9%   | 11%  | 15%  | 19%  |           |
| Neurology                  | No. of Graduates | 36   | 37   | 44   | 62   | 69   | 17.7      |
|                            | Percent          | 14%  | 13%  | 17%  | 26%  | 27%  |           |
| Other Medical Specialties  | No. of Graduates | 63   | 74   | 86   | 118  | 135  | 21.0      |
|                            | Percent          | 9%   | 10%  | 11%  | 20%  | 21%  |           |
| Other Surgical Specialties | No. of Graduates | 88   | 99   | 143  | 175  | 199  | 22.6      |
|                            | Percent          | 8%   | 10%  | 14%  | 20%  | 22%  |           |
| Total                      | No. of Graduates | 1119 | 1321 | 1562 | 1951 | 2416 | 21.2      |
|                            | Percent          | 11%  | 13%  | 16%  | 21%  | 25%  |           |

Abbreviations: CAGR = Compound Annual Growth Rate

\* Specialties were selected for individual display if the specialty had at least 1,000 medical graduates within the 5-year sample. The remaining specialties were categorized as other medical or other surgical.

† CAGR (Compound annual growth rate) supposing that year A is X and year B is Y,  $CAGR = (Y/X)^{1/(B-A)-1}$ .

## Supplementary References

- S1. Health Resources and Services Administration. Primary Care Loans. Available at: <http://www.hrsa.gov/loanscholarships/loans/primarycare.html>. Accessed April 29, 2016.
- S2. Association of American Medical Colleges. Physician Supply and Demand Through 2025: Key Findings. Available at: [https://www.aamc.org/download/457558/data/physician\\_supply\\_demand\\_2025\\_keyfindings\\_2016update.pdf](https://www.aamc.org/download/457558/data/physician_supply_demand_2025_keyfindings_2016update.pdf). Accessed April 29, 2016.
- S3. American College of Physicians. Internal Medicine residency match results virtually unchanged from last year. Available at: [http://www.acponline.org/newsroom/im\\_residency\\_match\\_results14.htm](http://www.acponline.org/newsroom/im_residency_match_results14.htm). Accessed September 30, 2015.
- S4. Association of American Medical Colleges. AAMC Debt Fact Card. Available at: <https://www.aamc.org/download/409092/data/13debtfactcard.pdf>. Accessed April 29, 2016.
- S5. Dorsey ER, Nincic D, Schwartz JS. An evaluation of four proposals to reduce the financial burden of medical education. *Acad Med*. 2006;81(3):245-51.
- S6. AAMC Data Book: Medical Schools and Teaching Hospitals by the Number. Washington, D.C.: Association of American Medical Colleges, 2014.
- S7. National Center for Education Statistics. National Postsecondary Student Aid Study (NPSAS), 2011-2012. Available at: <https://nces.ed.gov/surveys/npsas/>. Accessed April 29, 2016.

S8. US Department of Education Office of Federal Student Aid. Income Driven Repayment Plans. Available at: <https://studentaid.ed.gov/sa/repay-loans/understand/plans/income-driven>. Accessed April 29, 2016.
